# Supplementary material for: Dual-mode US/MRI nanoparticles delivering siRNA and Pt(iv) for ovarian cancer treatment
Source: Royal Society of Chemistry journal article supplement (doi:10.1039/c9ra03681d), 2019-01-01
Supplement: c9ra03681d1.pdf [file c9ra03681d1.pdf]

## Supporting Information

### Dual-mode US/MRI nanoparticles delivering siRNA and Pt(IV) for ovarian cancer treatment

Yanhua Zhang<sup>†,a</sup>, Hui Huang<sup>†,a</sup>, Hao Fu<sup>a</sup>, Meng Zhao<sup>a</sup>, Zhihua Wu<sup>a</sup>, Yang Dong<sup>a</sup>, He Li<sup>b</sup>, Yourong Duan<sup>a</sup> and Ying Sun<sup>\*,a</sup>

<sup>a</sup> State Key Laboratory of Oncogenes and Related Genes, Shanghai Cancer Institute, Renji Hospital, School of Medicine, Shanghai Jiao Tong University, Shanghai 200032, People's Republic of China.

<sup>b</sup> Traditional Chinese Medicine Department, Renji Hospital, School of Medicine, Shanghai Jiao Tong University, Shanghai 200127, China.

\* Correspondence: Ying Sun, [ysun@shsci.org](mailto:ysun@shsci.org).

† These authors contributed equally to this work.

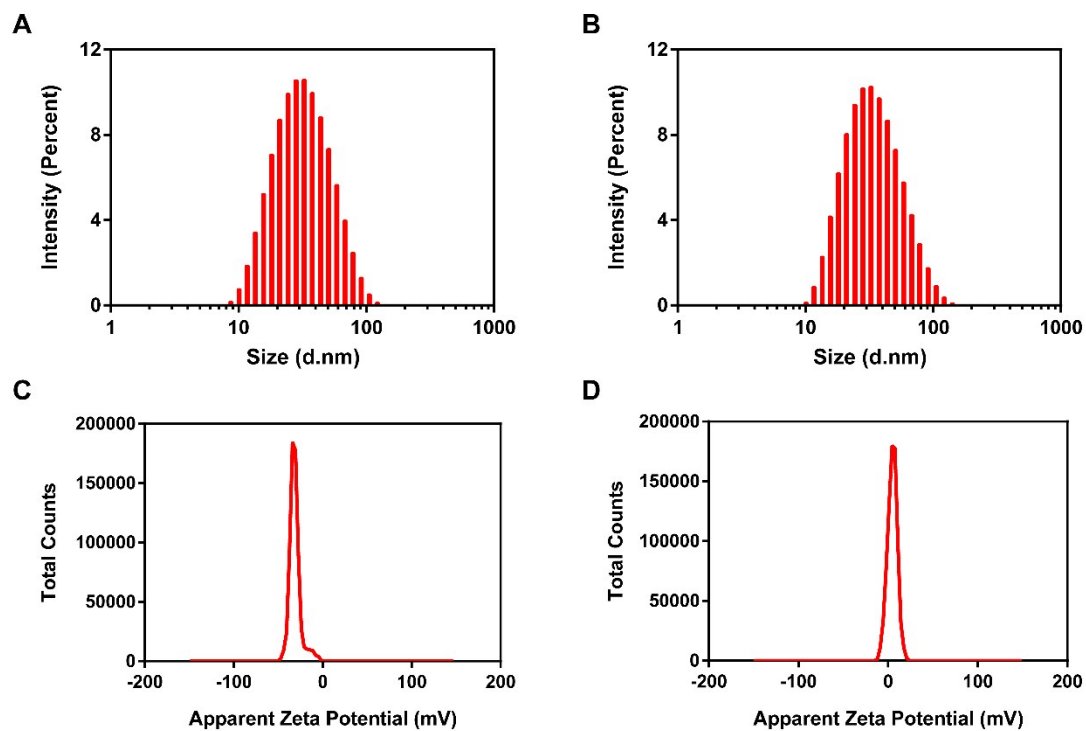

**Figure S1.** The size and zeta of  $\text{Fe}_3\text{O}_4$  nanoparticles before and after modification (A) The size of  $\text{Fe}_3\text{O}_4$  nanoparticles before modification; (B) The size of  $\text{Fe}_3\text{O}_4$  nanoparticles after modification; (C) The zeta of  $\text{Fe}_3\text{O}_4$  nanoparticles before modification; (D) The zeta of  $\text{Fe}_3\text{O}_4$  nanoparticles after modification.

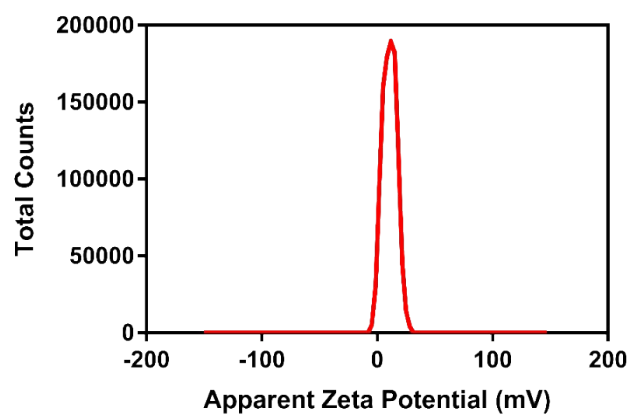

**Figure S2.** Zeta potential of siRNA/ $\text{Fe}_3\text{O}_4$ @Pt(IV) NPs-cRGD.

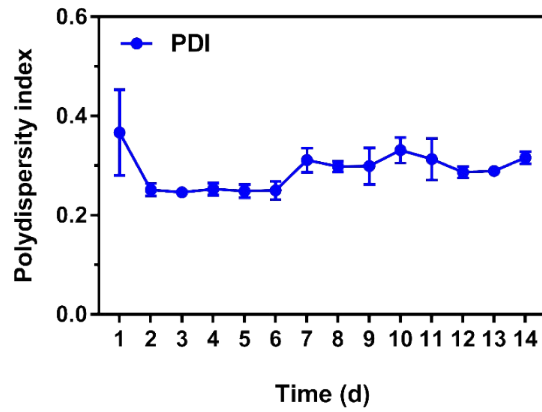

**Figure S3.** Polydispersity index change of siRNA/Fe<sub>3</sub>O<sub>4</sub>@Pt(IV) NPs-cRGD monitored at 4 °C for two weeks.

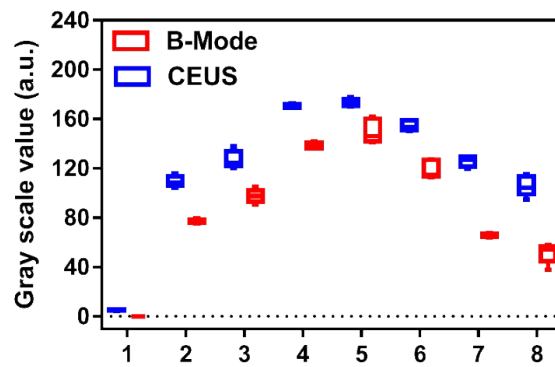

**Figure S4.** Corresponding quantification of gray scale values of siRNA/Fe<sub>3</sub>O<sub>4</sub>@Pt(IV) NPs-cRGD changed along with the changes in US exposure time. The data are shown as the mean ± SD of three independent experiments.

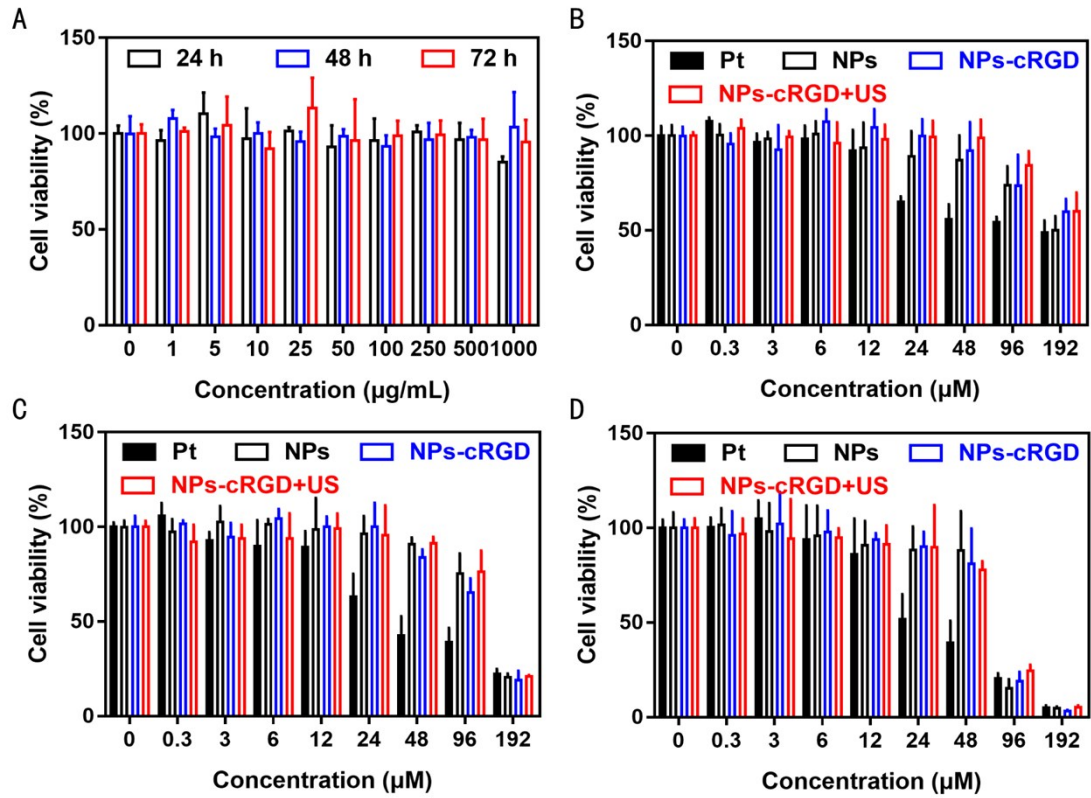

**Figure S5.** (A) Cell viability of L929 cell with the treatment of various concentrations of  $\text{Fe}_3\text{O}_4@$  NPs-cRGD for 24 h, 48 h and 72 h. (B-D) Cell viability of the L929 cell treated with various concentrations of Pt(II), siRNA/ $\text{Fe}_3\text{O}_4@$ Pt(IV) NPs, NPs-cRGD and NPs-cRGD+US for 24 h (B), 48 h (C) and 72 h (D). The data are presented as the mean  $\pm$  SD of three independent experiments.
